# Supplementary material for: High Faraday efficiency of Cu1Co1–BCN based on a dodecahydro-closo-dodecaborate hybrid for electrocatalytic reduction of nitrate to ammonia
Source: Royal Society of Chemistry journal article supplement (doi:10.1039/d3ta04385a), 2023-01-01
Supplement: d3ta04385a1.pdf [file d3ta04385a1.pdf]

## Supplementary Information

### High Faraday efficiency of Cu<sub>1</sub>Co<sub>1</sub>-BCN based on Dodecahydro-*Closo*-Dodecaborate Hybrid for electrocatalytic reduction of nitrate to ammonia

Jiajia Wang<sup># a, b</sup>, Zhengyu Fan<sup># b</sup>, Haixu Zhao<sup>b</sup>, Xun Liu<sup>b</sup>, Mai Zheng<sup>b</sup>, Long Zhang<sup>a, \*</sup>, Yingtang  
Zhou<sup>c, \*</sup>, Lijie Sun<sup>d</sup>, Jinghuan Liu<sup>d, e</sup>, Haibo Zhang<sup>b, \*</sup>

<sup>a</sup> School of Optoelectronic Materials and Technology, Jiangnan University, Wuhan, 430056, China.

<sup>b</sup> College of Chemistry and Molecular Sciences; Engineering Research Center of Organosilicon Compounds &  
Materials, Ministry of Education, Wuhan University, Wuhan, 430072, China.

<sup>c</sup> National Engineering Research Center for Marine Aquaculture, Marine Science and Technology College Zhejiang  
Ocean University, Zhoushan, 316004, China

<sup>d</sup> Shijiazhuang Siyao Co., Ltd, Shijiazhuang, 050000, China

<sup>e</sup> College of Pharmacy, Hebei Medical University, Shijiazhuang, 050000, China

E-mail addresses: [lzh131@jhun.edu.cn](mailto:lzh131@jhun.edu.cn) (L. Zhang), [zhouyingtang@zjou.edu.cn](mailto:zhouyingtang@zjou.edu.cn) (Y.Zhou) ,

[haibozhang1980@gmail.com](mailto:haibozhang1980@gmail.com) (H.B Zhang)

Jiajia Wang and zhengyu Fan contributed equally to this work.

## Contents

### Texts

**Text S1.** Chemical and materials

**Text S2.** Material characterization methods

**Text S3.** Product detection method

**Text S4.** DFT calculations

### Figures

**Fig. S1.** (a) The SEM images of Cu-BCN and (b) Cu<sub>1</sub>Co<sub>1</sub>-BCN.

**Fig. S2.** (a) The Cu 2p spectrum of Cu-BCN and (b) Cu<sub>1</sub>Co<sub>1</sub>-BCN, XPS spectrum and (c) Auger spectrum of Cu in Cu<sub>1</sub>Co<sub>1</sub>-BCN.

**Fig. S3.** The LSV curve when the electrolyte with NO<sub>3</sub><sup>-</sup> and without NO<sub>3</sub><sup>-</sup>, where (a) Cu-BCN, Cu<sub>2</sub>Co<sub>1</sub>-BCN, Cu<sub>1</sub>Co<sub>1</sub>-BCN and Cu<sub>1</sub>Co<sub>2</sub>-BCN as working electrode.

**Fig. S4.** Current-time curve under different applied potentials (Cu-BCN as working electrode).

**Fig. S5.** The standard curve of (a) NH<sub>4</sub><sup>+</sup>, (b) NO<sub>2</sub><sup>-</sup> and (c) NO<sub>3</sub><sup>-</sup>.

**Fig. S6.** (a) The Faraday efficiency and the rate of ammonia production, (b) ratio of Faraday efficiency of Cu-BCN, the Faraday efficiency and the rate of NO<sub>2</sub><sup>-</sup> production (c) Cu-BCN, (d) Cu<sub>1</sub>Co<sub>1</sub>-BCN.

**Fig. S7.** Ammonia yield with and without nitrate at -0.5 V vs. RHE when Cu<sub>1</sub>Co<sub>1</sub>-BCN as catalyst.

### **Text S1. Chemical and materials**

All reagents were used without any further purification. All the chemicals were of analytical grade and were used as received without further purification. The reagents were purchased from Aladdin Chemical Reagent Co., Ltd. Nafion 117 proton exchange membrane was purchased from Shanghai Hesen Electric Co., Ltd. Hydrophilic carbon paper (CP) was purchased from Shanghai Hesen Electric Co., Ltd.

### **Text S2. Material characterization methods**

The morphology of the synthesized  $\text{Cu}_x\text{Co}_y\text{-BCN}$  was examined with scanning electron microscopy (SEM, HITACHI SU8010, Japan). The elemental mapping, HRTEM images were explored by a JEM-2100F electron microscope (JEOL, Japan HITACHI). The chemical functional groups were investigated by Fourier transformed infrared spectroscopy (FTIR, Nicolet6700, Thermo Scientific, USA). X-ray diffraction (XRD) patterns were recorded with  $\text{Cu K}\alpha$  radiation (Empyrean, PANalytical B. V.). X-Ray photoelectron spectra (XPS) were collected by a Thermo ESCALAB 250xi X-ray photoelectron spectrometer with  $\text{Al K}\alpha$  X-ray (1486.6 eV) as the excitation source.

### **Text S3. Product detection method**

#### 3.1 The detection of $\text{NH}_4^+\text{-N}$ yields:

Detection of  $\text{NH}_4^+\text{-N}$  was performed using indophenol blue colorimetry: six standard solution gradients of 0.1  $\mu\text{g/mL}$ , 0.4  $\mu\text{g/mL}$ , 0.8  $\mu\text{g/mL}$ , 1.6  $\mu\text{g/mL}$ , 2.5  $\mu\text{g/mL}$ , 4  $\mu\text{g/mL}$  of  $\text{NH}_4\text{Cl}$  in 0.1 M KOH solution were prepared. Adding 0.2 mL of 1 wt% sodium nitroprusside solution, 2 mL of 1 M NaOH solution (containing 5 wt% salicylic acid and 5 wt% sodium citrate), and 1 mL of 0.05 M NaClO solution (to be used as needed) to 2 mL gradient standard solutions. After standing for 2 h, the absorbance at 657 nm was recorded on the ultraviolet spectrophotometer, and the standard curve line was drawn according to the correlation between the absorbance of the ultraviolet spectrophotometer and the concentration of  $\text{NH}_4^+\text{-N}$  solution.

#### 3.2 The detection of $\text{NO}_2^-\text{-N}$ yields:

Detection of  $\text{NO}_2^-\text{-N}$  by colorimetric method. 0.1 g of N-(1-naphthyl)-ethylenediamine hydrochloride, 1.0 g of sulfonamide and 2.94 mL of phosphoric acid were dissolved in 50 mL of deionized water to form Griess color developer. Six standard solutions were prepared in 0.1 M KOH solution at 0.4  $\mu\text{g/mL}$ , 0.8  $\mu\text{g/mL}$ , 1  $\mu\text{g/mL}$ , 1.6  $\mu\text{g/mL}$ , 3.2  $\mu\text{g/mL}$ , 6.4  $\mu\text{g/mL}$  and 6.4  $\mu\text{g/mL}$  of

NaNO<sub>2</sub> solution. 1 mL of gradients of standard solutions was added to 2 mL of water with 1 mL of Griess colorant. After standing for 10 minutes for color development, the absorbance value at 540 nm was recorded on the UV-visible spectrophotometer, and the standard curve was drawn according to the relationship between absorbance and NO<sub>2</sub><sup>-</sup>-N solution concentration.

### 3.3 The detection of NO<sub>3</sub><sup>-</sup>-N yields:

Detection of NO<sub>3</sub><sup>-</sup>-N by colorimetric method. Six standard solutions (0.5 µg/mL, 1 µg/mL, 1.5 µg/mL, 2 µg/mL, 2.5 µg/mL, and 3 µg/mL) were prepared in 0.1 M KOH solution. The 2 mL standard solution, 1 mL 1 M HCl solution and 0.1 mL 0.8 wt% sulfamic acid solution were mixed. After standing for 30 minutes, the absorbance value at 208 nm was recorded on the UV-visible spectrophotometer, and the standard curve was drawn according to the relationship between the concentration gradient and absorbance.

## **Text S4. DFT calculations**

All of the spin-polarized DFT calculations were performed with the projector augmented plane-wave method based on MeadA platform, as implemented in the Vienna ab initio simulation package. The generalized gradient approximation proposed by Perdew-Burke-Ernzerhof is selected for the exchange-correlation potential. The Cu-BCN and Cu<sub>1</sub>Co<sub>1</sub>-BCN crystal structure has been modeled using a single periodic slab with a (2 x 2) and (2 x 1) super cell. The Cu (111) facet and Co (101) facet were investigated which was dominant facet according to the HTEM patterns, respectively. The suitable vacuum layers were set to 15 Å, in order to avoid the interaction between periodic structures. The cut-off energy for plane wave is set to 500 eV. The energy criterion is set to 10<sup>-5</sup> eV in iterative solution of the Kohn-Sham equation. The Brillouin zone integration is performed using a 1 × 2 × 2 k-mesh. The slab contains four layers with two layers are fixed. All the structures are relaxed until the residual forces on the atoms have declined to less than 0.05 eV/Å.

The free energy of adsorbed and non-adsorbed substances is calculated as below:

$$\Delta G_{\text{ads}} = \Delta E + \Delta E_{\text{ZPE}} - T\Delta S \quad (1)$$

where  $\Delta E_{\text{ads}}$ ,  $\Delta E_{\text{ZPE}}$ ,  $T$ , and  $\Delta S$ , represent adsorption energy, zero-point energy, temperature, and entropy change, respectively. In order to describe charged NO<sub>3</sub><sup>-</sup> (as a reference), a neutral HNO<sub>3</sub> gas was selected as a substitute for NO<sub>3</sub><sup>-</sup> and the energy of NO<sub>3</sub><sup>-</sup> was obtained in the thermodynamic cycle to avoid the difficulty of periodic DFT calculations for charged systems.

The free energy of the intermediate H\* state ( $\Delta G_{\text{H}^*}$ ) is considered to be a key indicator of the

HER activity of the electrocatalyst. According to Eq.1,

$$\Delta S = S_{H^*} - 1/2S(H_2) \approx -1/2S(H_2) \quad (2)$$

where  $S_{(H_2)}$  is the entropy of  $H_2(g)$  under standard conditions. Thus,  $\Delta E$  can be calculated as follows:

$$\Delta E_{H^*} = E_{(sub+ H^*)} - E_{(sub)} - 1/2E_{(H_2)} \quad (3)$$

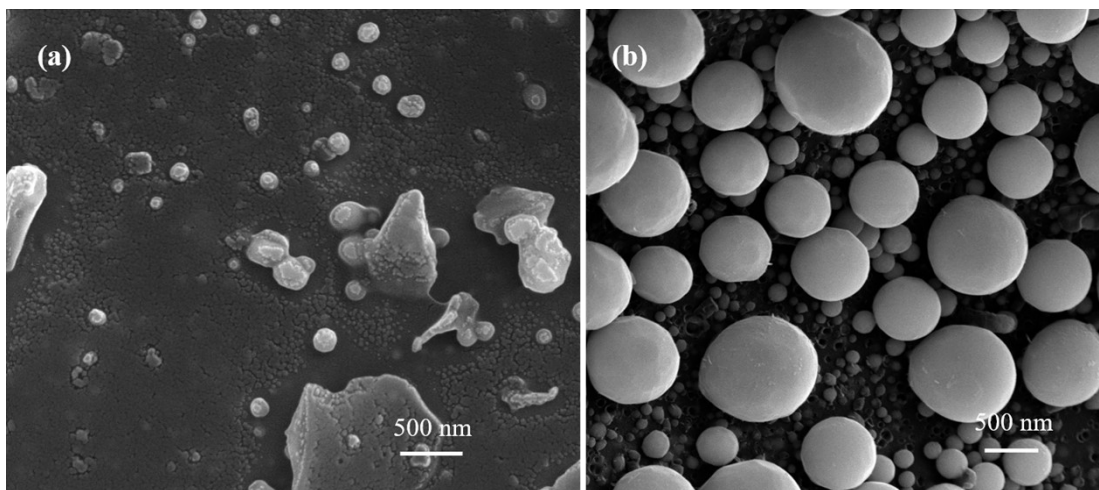

Fig. S1. (a) The SEM images of Cu-BCN and (b) Cu<sub>1</sub>Co<sub>1</sub>-BCN.

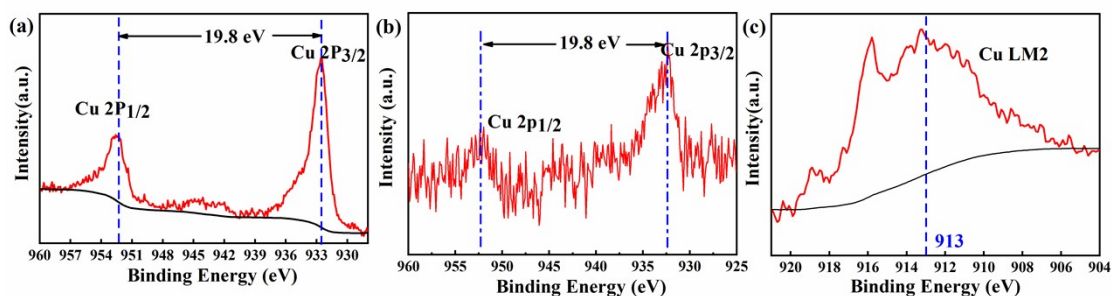

Fig. S2. (a) The Cu 2p spectrum of Cu-BCN and (b) Cu<sub>1</sub>Co<sub>1</sub>-BCN, XPS spectrum and (c) Auger spectrum of Cu in Cu<sub>1</sub>Co<sub>1</sub>-BCN.

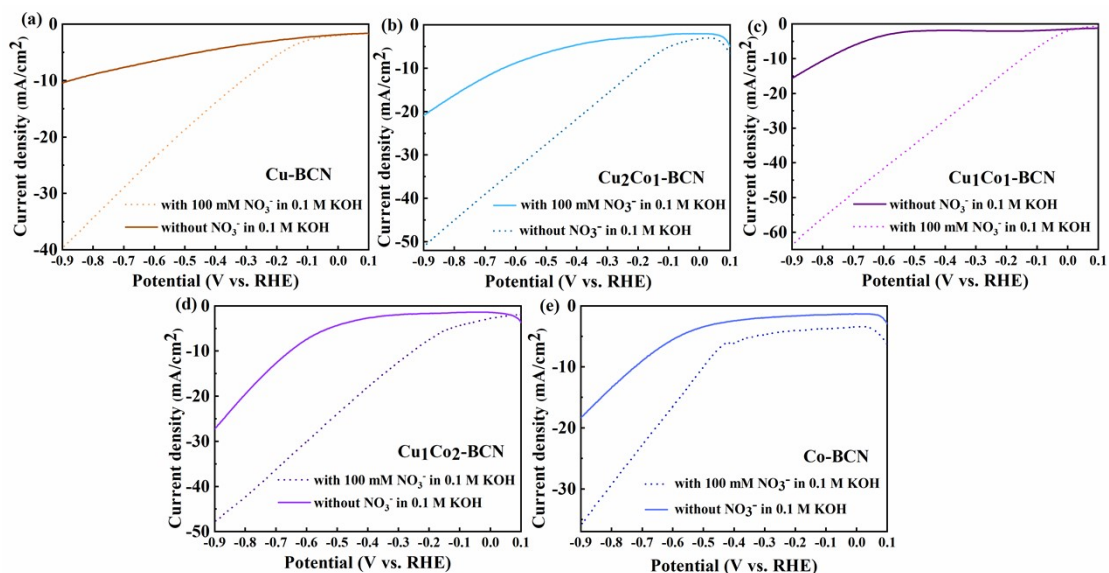

Fig. S3. The LSV curve when the electrolyte with NO<sub>3</sub><sup>-</sup> and without NO<sub>3</sub><sup>-</sup>, where (a) Cu-BCN, (b) Cu<sub>2</sub>Co<sub>1</sub>-BCN, (c) Cu<sub>1</sub>Co<sub>1</sub>-BCN, (d) Cu<sub>1</sub>Co<sub>2</sub>-BCN and (e) Co-BCN as working electrode.

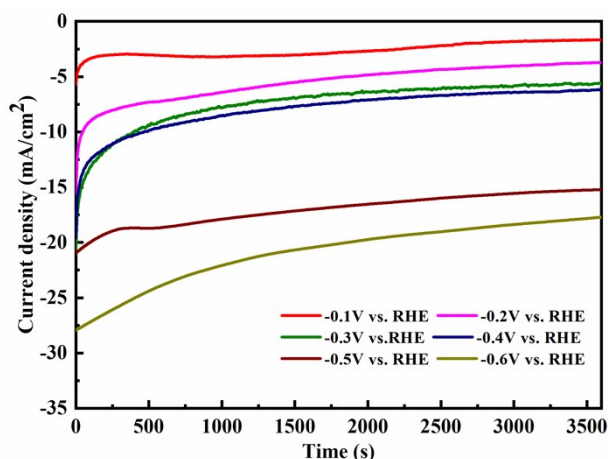

Fig. S4. Current-time curve under different applied potentials (Cu-BCN as working electrode).

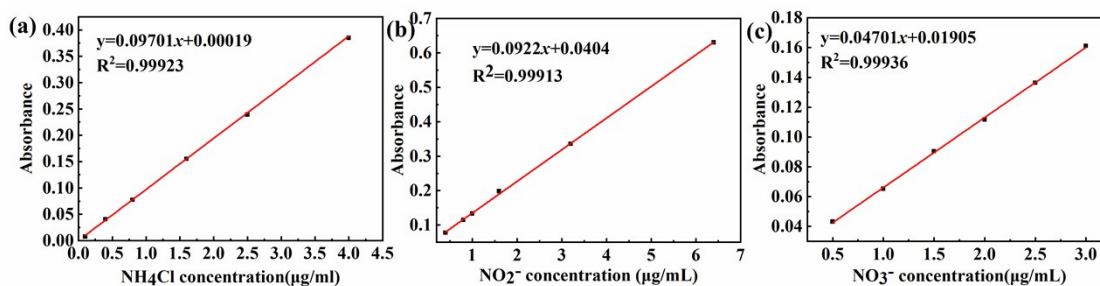

Fig. S5. The standard curve of (a)  $\text{NH}_4^+$ , (b)  $\text{NO}_2^-$  and (c)  $\text{NO}_3^-$ .

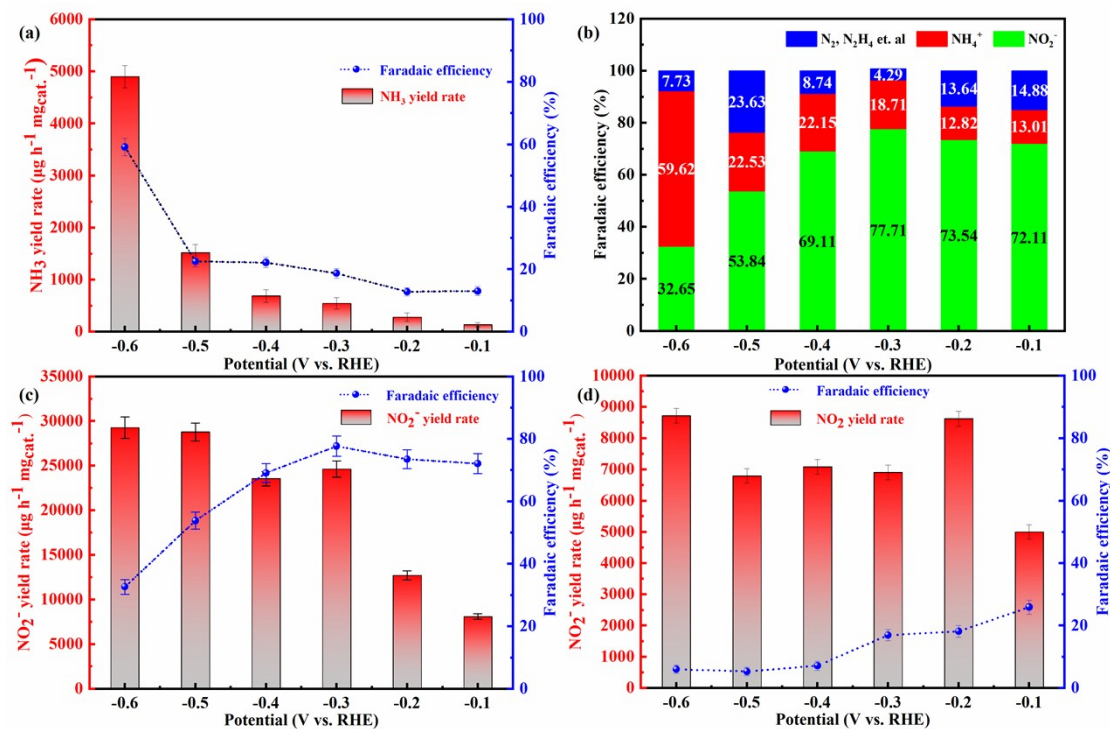

Fig. S6. (a) The Faraday efficiency and the rate of ammonia production, (b) ratio of Faraday efficiency of Cu-BCN, the Faraday efficiency and the rate of  $\text{NO}_2^-$  production (c) Cu-BCN, (d)  $\text{Cu}_1\text{Co}_1\text{-BCN}$ .

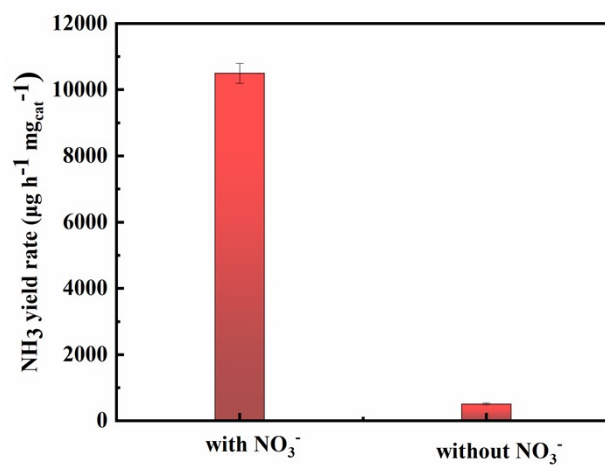

**Fig. S7. Ammonia yield with and without nitrate at -0.5 V vs. RHE when Cu<sub>1</sub>Co<sub>1</sub>-BCN as catalyst.**
